# Supplementary material for: Nocturia as an Unrecognized Symptom of Uncontrolled Hypertension in Black Men Aged 35 to 49 Years
Source: PubMed Central journal article supplement — J Am Heart Assoc. 2019 Mar 2;8(5):e010794. doi: 10.1161/JAHA.118.010794 (PMC6474941; doi:10.1161/jaha.118.010794), 2019-03-02

# **SUPPLEMENTAL MATERIAL**

**Table S1. Study Cohort Characteristics (N=4027, Ages 35-79)\*.**

| <b>Nocturia Frequency</b>      | <b>Ages 35-49<br/>Cohort A</b> | <b>Ages 35-49<br/>Cohort B</b> | <b>Ages 50-79</b> | <b>All patients</b> |
|--------------------------------|--------------------------------|--------------------------------|-------------------|---------------------|
| <b>N (%)</b>                   | 1673 (42)                      | 1748 (43)                      | 2279 (57)         | 4027                |
| <b>Known Determinants</b>      |                                |                                |                   |                     |
| Age (years), Mean $\pm$ SD     | 43 $\pm$ 4                     | 43 $\pm$ 4                     | 60 $\pm$ 7        | 53 $\pm$ 11         |
| Enlarged Prostate, N (%)       | 0                              | 19 (1)                         | 289 (13)          | 308 (8)             |
| Diabetes, N (%)                | 123 (7)                        | 139 (8)                        | 498 (22)          | 637 (16)            |
| Sleep Apnea, N (%)             | 141 (8)                        | 157 (9)                        | 292 (13)          | 449 (11)            |
| <b>Other Comorbidities</b>     |                                |                                |                   |                     |
| Body Mass Index, Mean $\pm$ SD | 30 $\pm$ 6                     | 30 $\pm$ 6                     | 30 $\pm$ 6        | 30 $\pm$ 6          |
| Prostate Cancer, N (%)         | 0                              | 7 (0)                          | 126 (6)           | 133 (3)             |
| Heart Attack, N (%)            | 0                              | 17 (1)                         | 80 (4)            | 97 (2)              |
| Heart Failure, N (%)           | 0                              | 8 (0)                          | 62 (3)            | 70 (2)              |
| High Cholesterol, N (%)        | 274 (16)                       | 305 (17)                       | 771 (34)          | 1076 (27)           |
| Stroke, N (%)                  | 0                              | 18 (1)                         | 77 (3)            | 95 (2)              |
| Kidney Disease, N (%)          | 0                              | 17 (1)                         | 54 (2)            | 71 (2)              |

\*All p values are less than 0.05 when comparing cohort A (and cohort B) ages 35-49 with the ages 50-79 group.

†For ages 35-49Y, there are two cohorts: cohort A excludes patients with the co-morbidities prostate disease, heart attack, heart failure, kidney disease, and stroke; cohort B includes patients with these conditions.

**Table S2. Hypertension Status of Non-Hispanic Black Men Ages 35-49 Years:  
Los Angeles Barbershop Sample vs. NHANES (2013-2016)\*.**

|                        | <b>Los Angeles<br/>Barbershop<br/>Sample</b> | <b>NHANES*<br/>(USA)</b>  |               |
|------------------------|----------------------------------------------|---------------------------|---------------|
|                        | <b>N</b>                                     | <b>Weighted N</b>         |               |
| <b>Normotensive</b>    | 938                                          | 1,702,425                 |               |
|                        | <b>N<br/>(%)</b>                             | <b>Weighted N<br/>(%)</b> | <b>95% CI</b> |
| <b>Hypertensive</b>    | 735                                          | 1,328,768                 | -             |
| Untreated†             | 459<br>(62)                                  | 766,088<br>(58)           | (46 – 69)     |
| Treated, Uncontrolled† | 168<br>(23)                                  | 352,451<br>(26)           | (18 – 35)     |
| Treated, Controlled†   | 108<br>(15)                                  | 210,228<br>(16)           | (8 – 23)      |

CI, confidence interval

\*NHANES denotes National Health and Nutrition Examination Survey. NHANES values were weighted to represent the total United States population. Data presented are combined from the 2013-2014 and 2015-2016 surveys.

† Data are represented as sample size (percentage of the hypertensive sample) for each hypertension subgroup.

**Table S3. Logistic Regression for Nocturia ( $\geq 2$  nightly voids) With or Without Diuretics. (N = 1673).**

|                                                           | <b>OR</b> | <b>95% CI</b> | <b>p-value</b> |
|-----------------------------------------------------------|-----------|---------------|----------------|
| <b>Diabetes</b>                                           | 1.71      | (1.14, 2.55)  | 0.0088         |
| <b>Sleep Apnea</b>                                        | 1.46      | (1.00, 2.11)  | 0.0475         |
| <b>NT</b>                                                 | reference |               |                |
| <b>Untreated HTV</b>                                      | 1.39      | (1.08, 1.79)  | 0.0097         |
| <b>Treated HTV Controlled*<br/>(not on water pills)</b>   | 0.74      | (0.40, 1.36)  | 0.3273         |
| <b>Treated HTV Uncontrolled†<br/>(not on water pills)</b> | 2.38      | (1.57, 3.61)  | <.0001         |
| <b>Treated HTV Controlled*<br/>(on water pills)</b>       | 1.95      | (1.00, 3.80)  | 0.0495         |
| <b>Treated HTV Uncontrolled†<br/>(on water pills)</b>     | 3.15      | (1.82, 5.45)  | <.0001         |

\*p-value for the comparison of “Treated HTV Controlled on water pills” vs. “Treated HTV Controlled not on water pills” is 0.0279.

†p-value for the comparison of “Treated HTV Uncontrolled on water pills” vs. “Treated HTV Uncontrolled not on water pills” is 0.39.

**Table S4. Logistic Regression for Nocturia ( $\geq 2$  nightly voids) as a Determinant of Blood Pressure  $\geq 135/85$  mm Hg among Treated Hypertensives.**

|                    | <b>aOR</b> | <b>95% CI</b> | <b>p-value</b> |
|--------------------|------------|---------------|----------------|
| <b>Nocturia</b>    | 2.47       | (1.46 – 4.17) | 0.0007         |
| <b>Age</b>         | 1.04       | (0.98 – 1.10) | 0.2174         |
| <b>Diabetes</b>    | 1.13       | (0.62 – 2.03) | 0.6936         |
| <b>Sleep Apnea</b> | 0.72       | (0.38 – 1.37) | 0.3201         |

aOR, adjusted odds ratio; CI, confidence interval

**Figure S1. Sample Selection.**

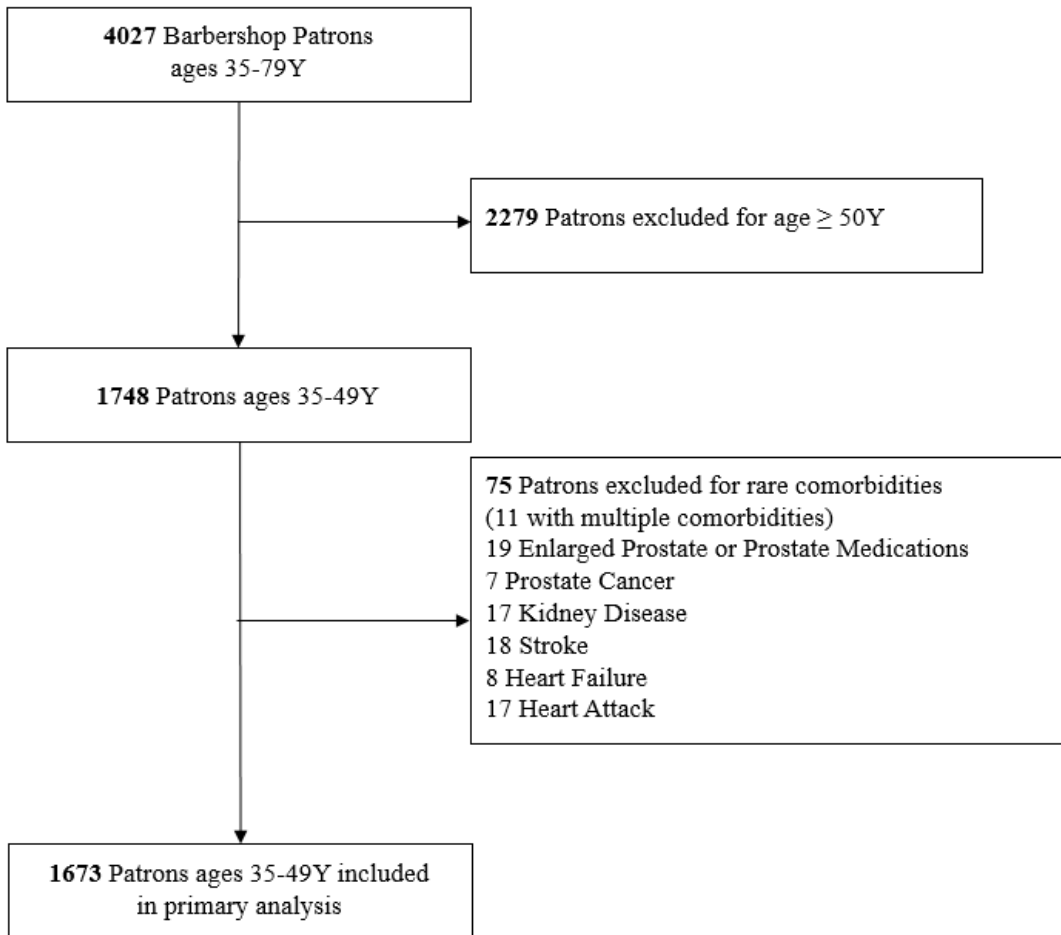

Supplement: JAH3-8-e010794-s001.pdf [file JAH3-8-e010794-s001.pdf]
